# Supplementary material
Source: PubMed Central journal article supplement (PMC3465999)
Supplement: supp_M027086_jlr.M027086-1.pdf [file supp_M027086_jlr.M027086-1.pdf]

## **Supplemental data**

### **Effects of lipoic acid on lipolysis in 3T3-L1 adipocytes**

Marta Fernández-Galilea <sup>1</sup>, Patricia Pérez-Matute <sup>1,2</sup>, Pedro L Prieto-Hontoria <sup>1</sup>, J. Alfredo Martínez <sup>1</sup>, Maria J Moreno-Aliaga <sup>1</sup>

<sup>1</sup>Department of Nutrition, Food Science, Physiology and Toxicology. University of Navarra. Pamplona (Spain).

<sup>2</sup>HIV and Associated Metabolic Alterations Unit. Infectious Diseases Area. Center for Biomedical Research of La Rioja (CIBIR). Logroño (Spain).

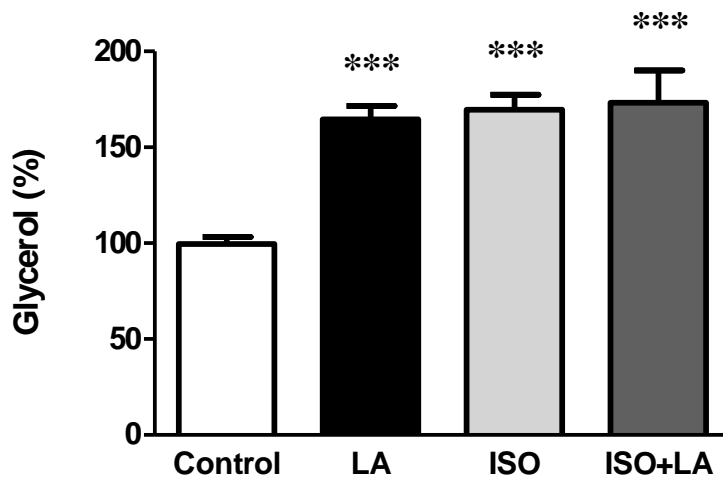

**Supplementary Figure I. LA stimulates basal but not isoproterenol-induced lipolysis.**

Differentiated 3T3-L1 adipocytes were treated with LA (250  $\mu$ M) in the absence or presence of isoproterenol ( $10^{-6}$  M) for 24 h. Lipolysis was estimated by measuring the amount of glycerol released into media. Data are means  $\pm$  SE of 4 independent experiments.

\*\*\* $P$ <0.001 vs. Control (vehicle-treated cells).

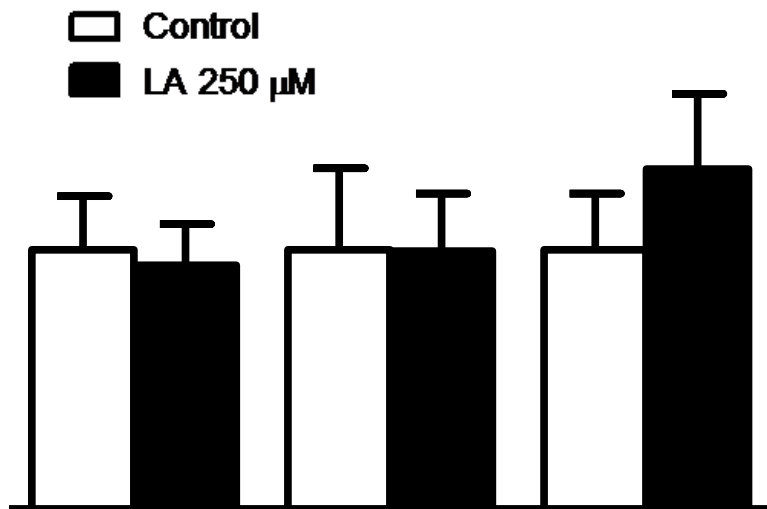

**Supplementary Figure II. LA treatment does not modify adipocyte differentiation markers in mature 3T3-L1 adipocytes.** Differentiated 3T3-L1 adipocytes were treated with LA (250  $\mu$ M) for 24 h. mRNA levels of several adipogenic factors (PPAR $\gamma$ , C/EBP $\alpha$  and C/EBP $\beta$ ) were determined by RT-PCR. Data are means  $\pm$  SE of 5 independent experiments.

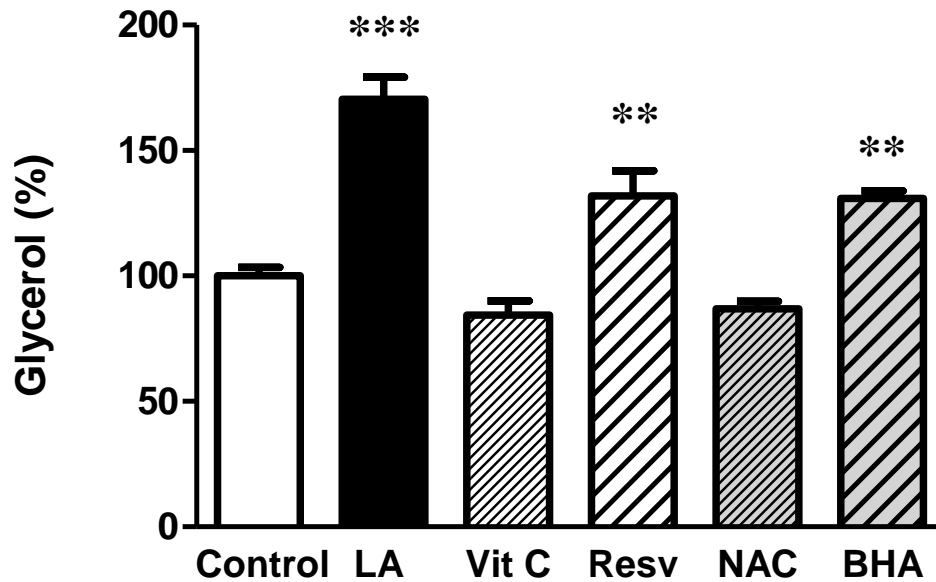

**Supplementary Figure III. Differential effects on lipolysis of several antioxidants.** The amount of glycerol released into media was determined in fully differentiated 3T3-L1 adipocytes treated with LA (250  $\mu$ M), Vit C (250  $\mu$ M), resveratrol (50  $\mu$ M), NAC (20 mM) and BHA (10 mM) during 24 h. Data are means  $\pm$  SE of at least 3 independent experiments. \*\*  $P < 0.01$  and \*\*\*  $P < 0.001$  vs. Control (vehicle-treated cells).

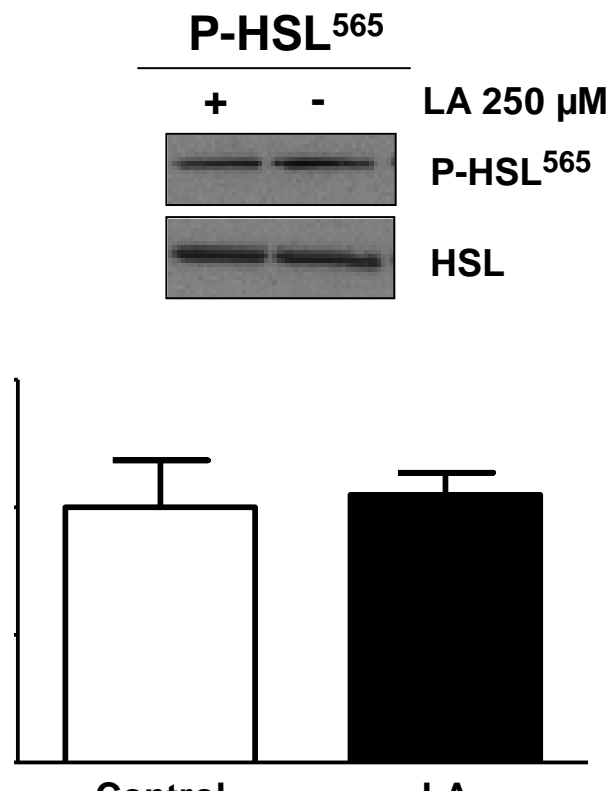

**Supplementary Figure IV.** LA does not phosphorylate HSL at Ser<sup>565</sup>. Representative Western blots for Ser<sup>565</sup>-phosphorylated HSL and total HSL in differentiated 3T3-L1 adipocytes treated with LA (250  $\mu$ M) for 1 h. Band intensities were normalized to total HSL.

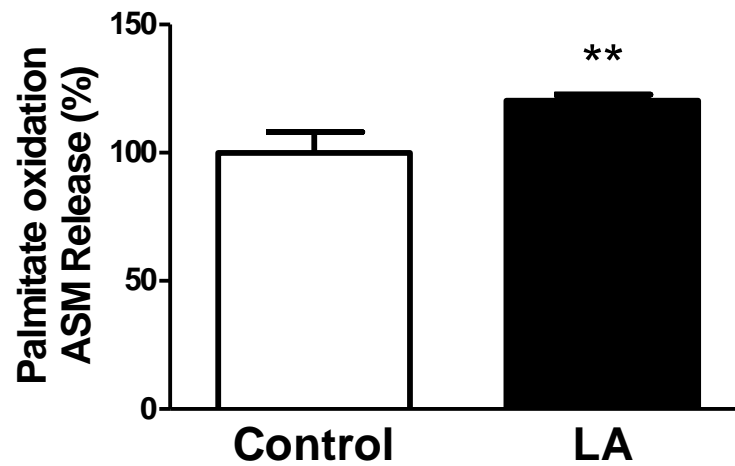

**Supplementary Figure V. LA increases palmitate oxidation to acid-soluble metabolites.**

Fatty acid oxidation was estimated as  $^{14}\text{C}$ -labeled palmitate oxidation to acid-soluble metabolites (ASM) in 3T3-L1 adipocytes treated for 6 h with or without LA (250  $\mu\text{M}$ ) in DMEM containing 2.5% BSA, 200  $\mu\text{M}$  L-carnitine, 200  $\mu\text{M}$  cold palmitic acid and 200  $\mu\text{M}$  [ $^{14}\text{C}(\text{U})$ ] palmitate (0.1  $\mu\text{Ci}/\text{mL}$ ). The value of a vehicle control was set at 100% and the relative value was presented as fold induction with respect to that of the vehicle control. Data are means  $\pm$  SE of 6 independent experiments. \*\*  $P < 0.01$ .
